# Supplementary material
Source: publisher figshare collection journal article supplement (https://karger.figshare.com/ndownloader/files/16343231)
Supplement: Supplementary file 1 [file 16343231]

**Supplementary table 1:**

**Performance to detect change in global cognition and executive domain**

| **Scopa-Cog** | **Performance to Detect Change in**  **Executive Domain** | | | |  | **Performance to Detect Global Cognitive Change** | | | |
| --- | --- | --- | --- | --- | --- | --- | --- | --- | --- |
| Decline Threshold | Sensitivity | Specificity | PPV | NPV |  | Sensitivity | Specificity | PPV | NPV |
| -1 | 62.0% | 49.1% | 20.8% | 85.7% |  | 71.4% | 51.8% | 26.8% | 88.0% |
| -2 | 54.0% | 63.4% | 24.1% | 86.5% |  | 53.6% | 63.7% | 26.8% | 84.7% |
| -3 | 38.0% | 77.6% | 26.8% | 85.3% |  | 33.9% | 77.0% | 26.8% | 82.5% |
| -4 | 32.0% | 83.2% | 29.1% | 85.0% |  | 28.6% | 82.7% | 29.1% | 82.4% |
| -5 | 24.0% | 87.1% | 28.6% | 84.2% |  | 21.4% | 86.7% | 28.6% | 81.7% |
| -6 | 12.0% | 93.5% | 28.6% | 83.1% |  | 12.5% | 93.8% | 33.3% | 81.2% |
| -7 | 10.0% | 96.1% | 35.7% | 83.2% |  | 10.7% | 96.5% | 42.9% | 81.3% |
| -8 | 8.0% | 98.7% | 57.1% | 83.3% |  | 7.1% | 98.7% | 57.1% | 81.1% |
| -9 | 4.0% | 99.1% | 50.0% | 82.7% |  | 3.6% | 99.1% | 50.0% | 80.6% |
| -10 | 2.0% | 99.1% | 33.3% | 82.4% |  | 1.8% | 99.1% | 33.3% | 80.3% |
| -11 | 2.0% | 99.6% | 50.0% | 82.5% |  | 1.8% | 99.6% | 50.0% | 80.4% |
| -12 | 2.0% | 100.0% | 100.0% | 82.6% |  | 1.8% | 100.0% | 100.0% | 80.4% |
| -13 | 2.0% | 100.0% | 100.0% | 82.6% |  | 1.8% | 100.0% | 100.0% | 80.4% |
| -14 | 2.0% | 100.0% | 100.0% | 82.6% |  | 1.8% | 100.0% | 100.0% | 80.4% |
|  |  |  |  |  |  |  |  |  |  |
| **MMSE** |  |  |  |  |  |  |  |  |  |
| Decline Threshold | Sensitivity | Specificity | PPV | NPV |  | Sensitivity | Specificity | PPV | NPV |
| -1 | 36.0% | 64.7% | 18.0% | 82.4% |  | 41.1% | 65.9% | 23.0% | 81.9% |
| -2 | 24.0% | 81.5% | 21.8% | 83.3% |  | 28.6% | 82.7% | 29.1% | 82.4% |
| -3 | 16.0% | 91.4% | 28.6% | 83.5% |  | 16.1% | 91.6% | 32.1% | 81.5% |
| -4 | 8.0% | 96.6% | 33.3% | 83.0% |  | 7.1% | 96.5% | 33.3% | 80.7% |
| -5 | 4.0% | 99.6% | 66.7% | 82.8% |  | 0.0% | 98.7% | 0.0% | 79.9% |
| -6 | 2.0% | 100.0% | 100.0% | 82.6% |  | 0.0% | 99.6% | 0.0% | 80.1% |
| **MOCA** |  |  |  |  |  |  |  |  |  |
| Decline Threshold | Sensitivity | Specificity | PPV | NPV |  | Sensitivity | Specificity | PPV | NPV |
| -1 | 50.0% | 60.8% | 21.6% | 84.9% |  | 44.6% | 59.7% | 21.6% | 81.3% |
| -2 | 40.0% | 78.4% | 28.6% | 85.8% |  | 37.5% | 78.3% | 30.0% | 83.5% |
| -3 | 30.0% | 87.1% | 33.3% | 85.2% |  | 28.6% | 87.2% | 35.6% | 83.1% |
| -4 | 20.0% | 94.4% | 43.5% | 84.6% |  | 21.4% | 95.1% | 52.2% | 83.0% |
| -5 | 16.0% | 97.4% | 57.1% | 84.3% |  | 17.9% | 98.2% | 71.4% | 82.8% |
| -6 | 8.0% | 99.1% | 66.7% | 83.3% |  | 10.7% | 100.0% | 100.0% | 81.9% |
| -7 | 4.0% | 99.6% | 66.7% | 82.8% |  | 5.4% | 100.0% | 100.0% | 81.0% |
| -8 | 4.0% | 100.0% | 100.0% | 82.9% |  | 3.6% | 100.0% | 100.0% | 80.7% |
| -9 | 4.0% | 100.0% | 100.0% | 82.9% |  | 3.6% | 100.0% | 100.0% | 80.7% |
| -10 | 2.0% | 100.0% | 100.0% | 82.6% |  | 1.8% | 100.0% | 100.0% | 80.4% |
